# Supplementary material
Source: PubMed Central journal article supplement (PMC3697549)
Supplement: AEM.00704-13_zam999104489so1.pdf [file AEM.00704-13_zam999104489so1.pdf]

# Supplemental Information for:

## Characterization of Site Directed Mutations in the Lanthipeptide Mutacin 1140

Shaorong Chen <sup>#a</sup>, Shawanda Wilson-Stanford <sup>#a</sup>, William Cromwell <sup>a</sup>, Jeffrey D. Hillman <sup>b</sup>, Adam Guerrero <sup>a</sup>, Charlotte A. Allen <sup>a</sup>, Joseph A. Sorg <sup>a</sup>, Leif Smith <sup>a\*</sup>

<sup>a</sup> Department of Biological Sciences, Texas A&M University, College Station, TX 77843

<sup>b</sup> Oragenics Inc. 13700 Progress Blvd., Alachua, FL 32615

<sup>#</sup> The authors contribute equally.

\*Corresponding author: Leif Smith, Department of Biological Sciences, Texas A&M University, College Station, TX 77843, Phone: 979-845-2417, Fax: 979-845-2891, Email: [jsmith@bio.tamu.edu](mailto:jsmith@bio.tamu.edu)

### Contents:

Supplemental Table 1. Primers Used for Mutagenesis of MU1140

Supplemental Table 2. Aligned sequences of natural lanthipeptide variants

Supplemental Table 3. Bioactivity of Strains Producing Variants of Mutacin 1140 Compared to Mutacin 1140

Supplemental Figure 1. MALDI TOF mass spectra for mutacin 1140 variants

Supplemental Figure 2. RP-HPLC Chromatograms of purified lanthipeptides

Supplemental References

**Supplemental Table 1.** Primers Used for Mutagenesis of MU1140

| Primers         | Sequence (5' – 3')                               |
|-----------------|--------------------------------------------------|
| SRWmutA_F       | AGAATTCAGGATGCTATCGCTGCTTTTTTTGTG                |
| SRWmutA_R       | AGAATTCAGGAAAGTTGCCATATGGTTTTGTG                 |
| Phe1Gly_F       | GATCCAGATACTCGT <b>GG</b> CAAAAGTTGGAGCCTTTGTACG |
| Phe1Gly_R       | CAACTTTT <b>GCC</b> ACGAGTATCTGGATCGTCGTTGC      |
| Phe1Ile_F       | GATCCAGATACTCGT <b>ATC</b> AAAAGTTGGAGCCTTTGTACG |
| Phe1Ile_R       | CAACTTTT <b>GAT</b> ACGAGTATCTGGATCGTCGTTGC      |
| Phe1Thr_F       | GATCCAGATACTCGT <b>ACC</b> AAAAGTTGGAGCCTTTGTACG |
| Phe1Thr_R       | CAACTTTT <b>GGT</b> ACGAGTATCTGGATCGTCGTTGC      |
| Phe1Ser_F       | GATCCAGATACTCGT <b>TCC</b> AAAAGTTGGAGCCTTTGTACG |
| Phe1Ser_R       | CAACTTTT <b>GGA</b> ACGAGTATCTGGATCGTCGTTGC      |
| Phe1Trp_F       | GATCCAGATACTCGT <b>TGG</b> AAAAGTTGGAGCCTTTGTACG |
| Phe1Trp_R       | CAACTTTT <b>CCA</b> ACGAGTATCTGGATCGTCGTTGC      |
| Trp4Ala_F       | <b>GCA</b> AGCCTTTGTACGCCTGGTTG                  |
| Trp4Ala_R       | ACAAAGGCT <b>TGC</b> ACTTTTGAAACG                |
| Trp4insAla_F    | <b>GCA</b> AGCCTTTGTACGCCTGGTTG                  |
| Trp4insAla_R    | CAAAGGCT <b>TGCC</b> CAACTTTTGAAACG              |
| $\Delta$ Trp4_F | ---AGCCTTTGTACGCCTGGTTG                          |
| $\Delta$ Trp4_R | CGTACAAAGGCT---ACTTTTGAAACG                      |
| Dha5Ala_F       | <b>GCA</b> CTTTGTACGCCTGGTTGTGC                  |
| Dha5Ala_R       | GGCGTACAAAG <b>TGCC</b> CAACTTTTGAA              |
| Alas7insAla_F   | <b>GCA</b> ACGCCTGGTTGTGCAAGGAC                  |
| Alas7insAla_R   | ACCAGGCG <b>TGC</b> ACAAAGGCTCC                  |
| Arg13Asp_F      | <b>GAC</b> ACAGGTAGTTTCAATAGTTAC                 |
| Arg13Asp_R      | GAAACTACCTGT <b>GTCT</b> GCACAACCAG              |
| Phe17insAla_F   | <b>GCA</b> AATAGTTACTGTTGCTG                     |
| Phe17insAla_R   | GTAACTATTT <b>TGCG</b> AAACTCCATG                |
| Asn18Ala_F      | <b>GCA</b> AGTTACTGTTGCTGATTG                    |
| Asn18Ala_R      | ACAGTAACT <b>TGCG</b> AAACTACCTG                 |

Outside primers are SRWmutA\_F and SRWmutA\_R and are homologous to the 5' and 3' flanking DNA. Underlined section represents the engineered EcoRI site. Mutations are either bolded or dashes.

**Supplemental Table 2.** Aligned sequences of natural lanthipeptide variants

| Type-A1 Lanthipeptide | Name                                              | Core Peptide Sequence                                                 |
|-----------------------|---------------------------------------------------|-----------------------------------------------------------------------|
| Nisin Group           | Nisin A(1)                                        | I T S I S L C T P G - C K T G A L M G C N M K T A T C H C S I H V S K |
|                       | Nisin Z(2)                                        | I T S I S L C T P G - C K T G A L M G C N M K T A T C N C S I H V S K |
|                       | Nisin Q(3)                                        | I T S I S L C T P G - C K T G A L Q G C N L K T A T C N C S V H V S K |
|                       | Nisin F(4)                                        | I T S I S L C T P G - C K T G A L M G C N M K T A T C N C S V H V S K |
|                       | Nisin U(5)                                        | I T S K S L C T P G - C K T G I L M T C P L K T A T C G C H F G       |
|                       | Subtilin(6)                                       | W K S E S L C T P G - C V T G A L Q T C F L Q T L T C N C - - K I S K |
|                       | Ericin S(7)                                       | W K S E S V C T P G - C V T G V L Q T C F C Q T I T C N C - - H I S K |
|                       | Ericin A(7)                                       | V L S E S L C T P G - C I T G P L Q T C Y L C F P T F A K C           |
| Streptin(8)           | V G S R Y L C T P G S C W K L V C F T T T T V K   |                                                                       |
| Epidermin Group       | Epidermin(9)                                      | I A S K F I C T P G - C A K T G S - - F N S Y C C                     |
|                       | Epidermin [leu6](10)                              | I A S K F L C T P G - C A K T G S - - F N S Y C C                     |
|                       | Gallidermin(11)                                   | V A S K F L C T P G - C A K T G S - - F N S Y C C                     |
|                       | Staphylococcin T(12)                              | V A S K F L C T P G - C A K T G S - - F N S Y C C                     |
|                       | Mutacin B-Ny266(13)                               | F K S W S F C T P G - C A K T G S - - F N S Y C C                     |
|                       | Mutacin 1140/III(14, 15)                          | F K S W S L C T P G - C A R T G S - - F N S Y C C                     |
|                       | Mutacin 1(16)                                     | F S S L S L C S L G - C T G V K N P - F N S Y C C                     |
| Microbisporicin(17)   | V T S W S L C T P G - C T S P G G G S N C S F C C |                                                                       |
| Pep5 Group            | Epilancin K7(18)                                  | S A S V - L K T S I K V S K K Y C K G V - - - T L T C G C N I T G G K |
|                       | Epilancin 15X(19)                                 | S A S I - V K T T I K A S K K L C R G F - - - S L S C G C H F S G K K |
|                       | Pep5(20)                                          | T A G P A I R A S V K Q C Q K T L K A T R L F T V S C K G K N - G C K |
|                       | Epicidin 280(21)                                  | S L G P A I K A T - R Q V C P - - K A T R F V T V S C K K S D C Q     |

\*Amino acid residues are highlighted in grey that differ from the representative sequence highlighted in yellow.

**Supplemental Table 3.** Bioactivity of Strains Producing Variants of Mutacin 1140 Compared to Wild-Type Mutacin 1140

| Variant Produced         | Mean Area*<br>(mm <sup>2</sup> ) | Standard Error of the<br>Mean (SEM) | Ratio of Variant to<br>Wild-Type Activities | Statistical<br>Significance<br>(p value) <sup>#</sup> |
|--------------------------|----------------------------------|-------------------------------------|---------------------------------------------|-------------------------------------------------------|
| Mutacin 1140 (wild-type) | 299.29                           | 59.58                               | -                                           | -                                                     |
| Phe1Gly                  | 290.49                           | 35.07                               | 0.970577                                    | >.05                                                  |
| Phe1Ser                  | 308.87                           | 35.78                               | 1.031981                                    | >.05                                                  |
| Phe1Thr                  | 394.76                           | 50.52                               | 1.318951                                    | <.05                                                  |
| Phe1Ile                  | 550.04                           | 114.86                              | 1.837763                                    | <.05                                                  |
| Phe1Trp                  | 229.49                           | 50.61                               | 0.766769                                    | >.05                                                  |
| Trp4insAla               | 0                                | 0                                   | 0                                           | <.05                                                  |
| ΔTrp4                    | 0                                | 0                                   | 0                                           | <.05                                                  |
| Trp4Ala                  | 576.43                           | 54.43                               | 1.925944                                    | <.05                                                  |
| DHA5Ala                  | 357.01                           | 42.85                               | 1.192853                                    | >.05                                                  |
| Ala57insAla              | 0                                | 0                                   | 0                                           | <.05                                                  |
| Arg13Asp                 | 655.65                           | 107.99                              | 2.19062                                     | <.05                                                  |
| Phe17insAla              | 0                                | 0                                   | 0                                           | <.05                                                  |
| Asn18Ala                 | 0                                | 0                                   | 0                                           | <.05                                                  |
| Trp4Ala-Arg13Asp         | 0                                | 0                                   | 0                                           | <.05                                                  |

\* Based on 10 independent samples.

<sup>#</sup> Student's t Test

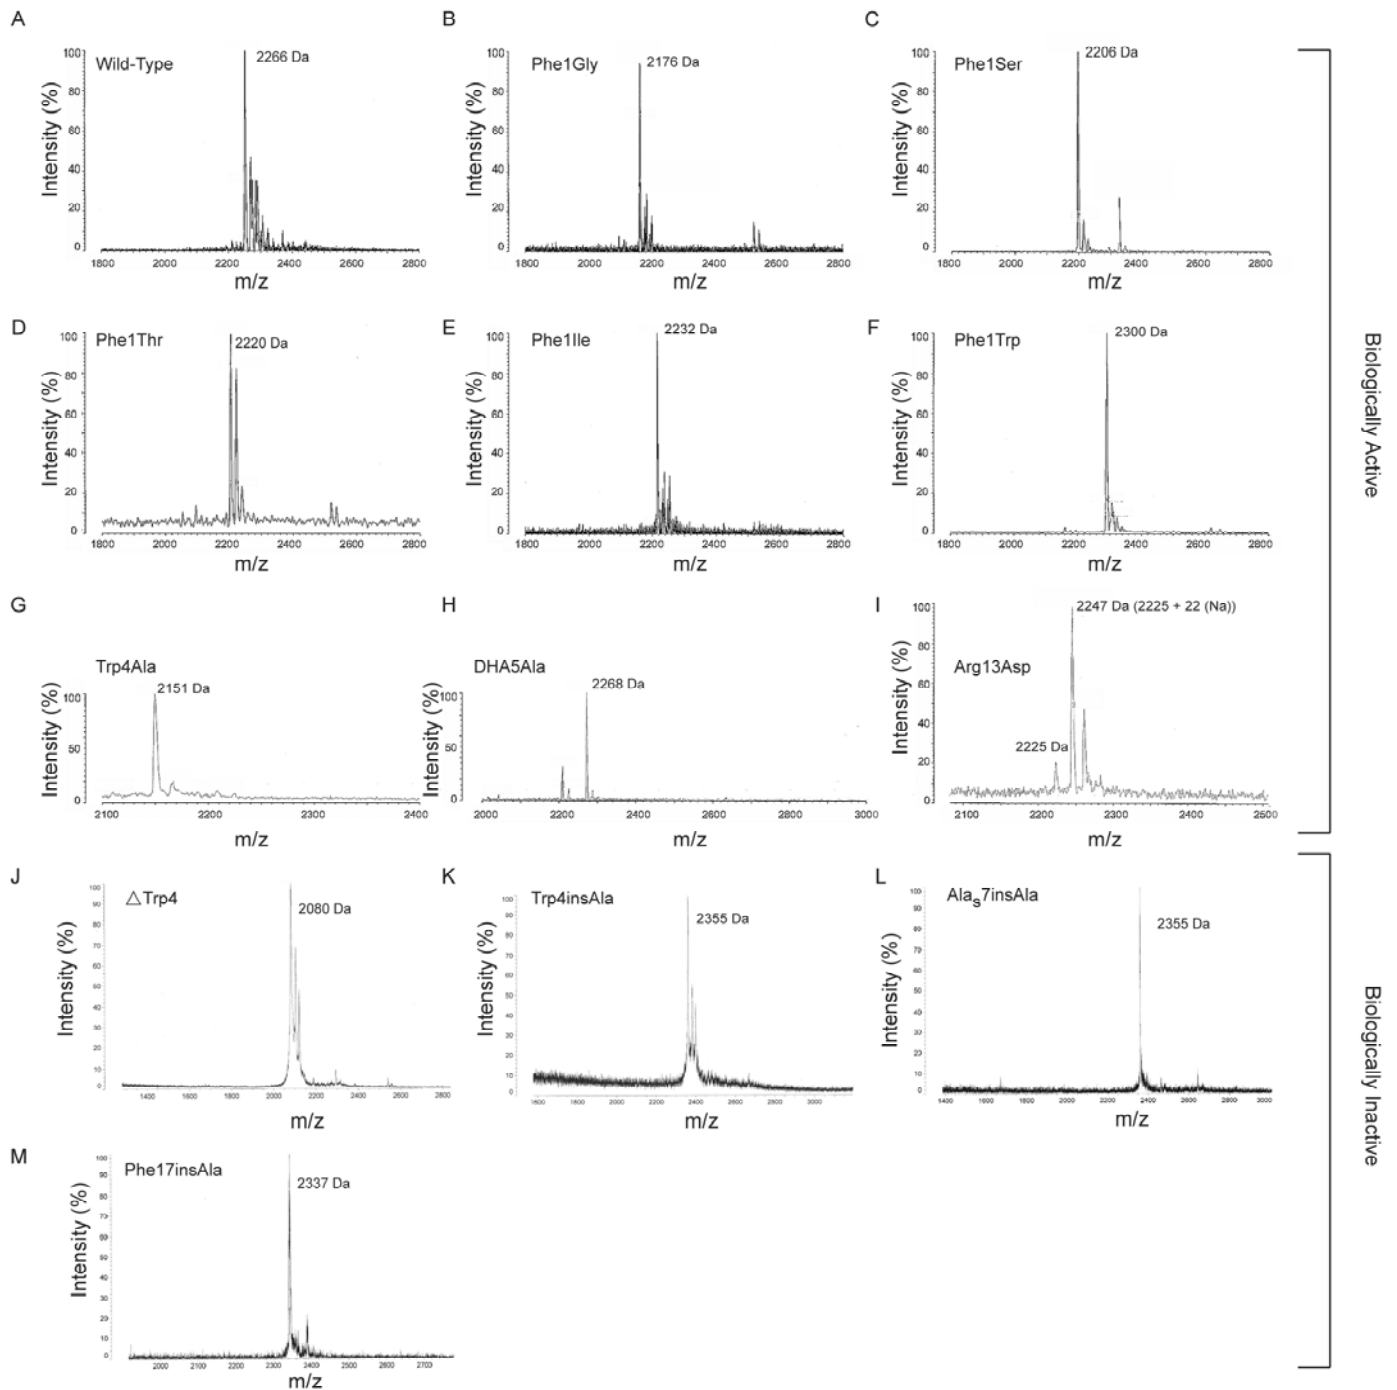

**Supplemental Figure 1.** MALDI TOF mass spectra for mutacin 1140 variants. Panel A. Mutacin 1140, Panel B. Mutacin 1140\_Phe1Gly variant; Panel C. Mutacin 1140\_Phe1Ser variant; Panel D. Mutacin 1140\_Phe1Thr variant; Panel E. Mutacin 1140\_Phe1Ile variant; Panel F. Mutacin 1140\_Phe1Trp variant; Panel G. Mutacin 1140\_Trp4Ala variant; Panel H. Mutacin 1140\_DHA5Ala variant; Panel I. Mutacin 1140\_Arg13Asp variant, Panel J. Mutacin 1140\_ $\Delta$ Trp4 variant, Panel K. Mutacin 1140\_Trp4insAla variant, Panel L. Mutacin 1140\_Ala<sub>7</sub>insAla variant, and Panel M. Mutacin 1140\_Phe17insAla variant.

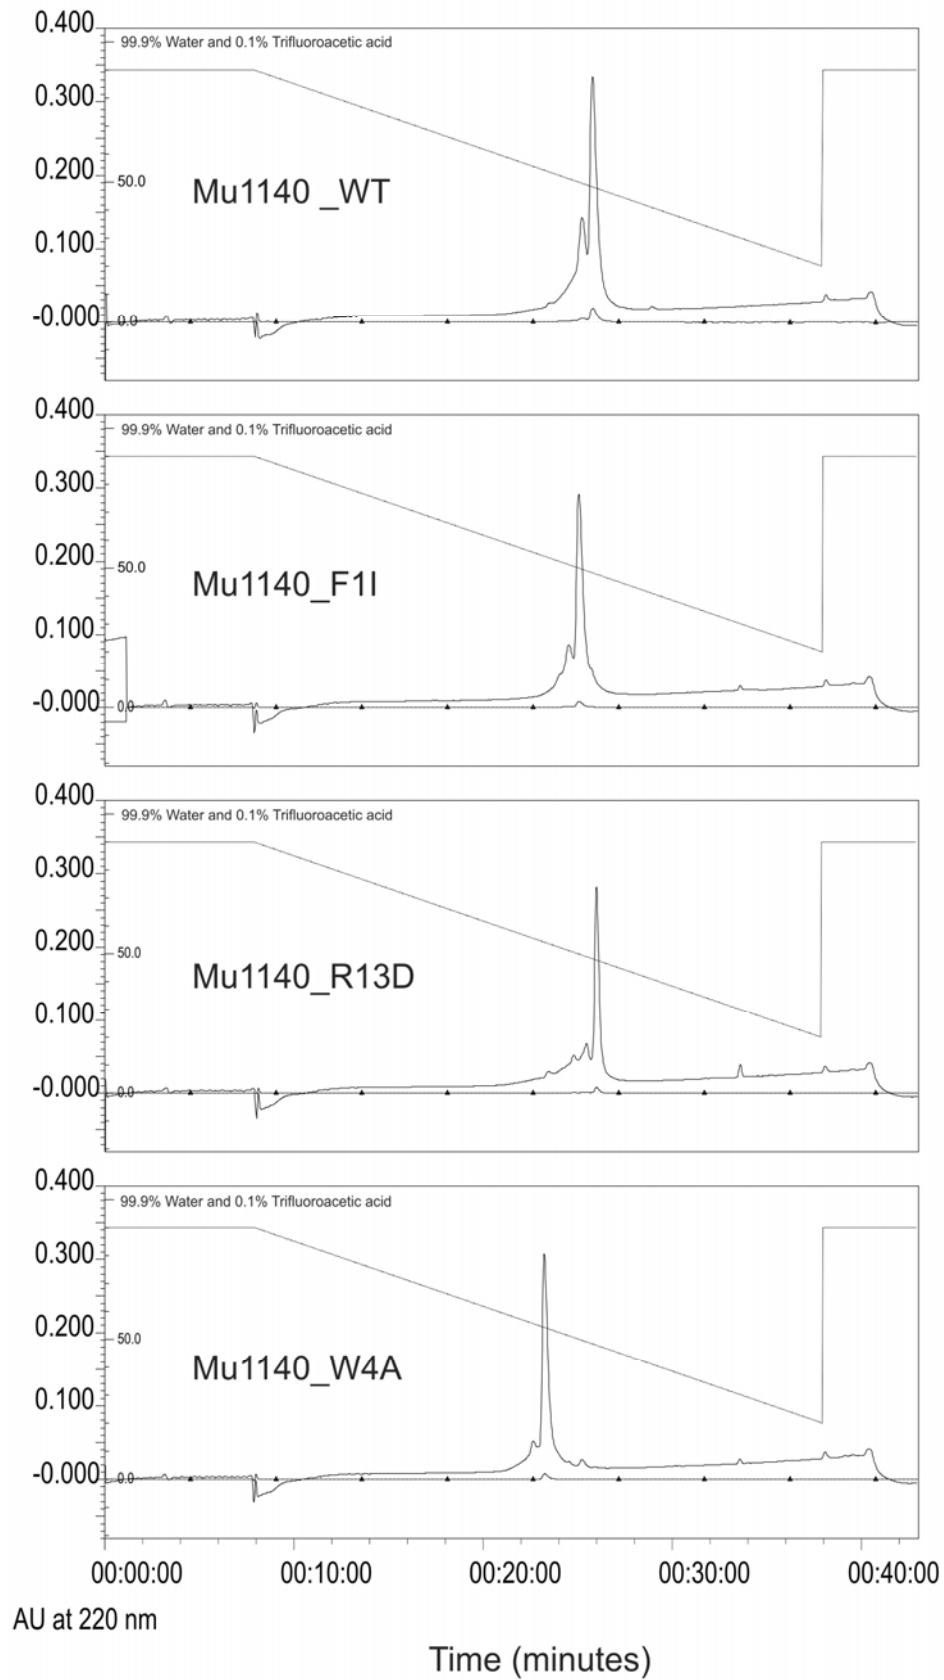

**Supplemental Figure 2.** RP-HPLC Chromatograms of purified mutacin 1140 and variants.

## Supplemental References

1. **Gross, E., and Morell, J. L.** (1971) Structure of Nisin, *JACS* **93**: 4634-&.
2. **Mulders, J. W. M., Boerrigter, I. J., Rollema, H. S., Siezen, R. J., and Devos, W. M.** (1991) Identification and Characterization of the Lantibiotic Nisin-Z, a Natural Nisin Variant, *Eur. J. Biochem.* **201**: 581-584.
3. **Zendo, T., Fukao, M., Ueda, K., Higuchi, T., Nakayama, J., and Sonomoto, K.** (2003) Identification of the lantibiotic Nisin Q, a new natural nisin variant produced by *Lactococcus lactis* 61-14 isolated from a river in Japan, *Biosci. Biotechnol. Biochem.* **67**: 1616-1619.
4. **De Kwaadsteniet, M., Doeschate, K. T., and Dicks, L. M. T.** (2009) Nisin F in the treatment of respiratory tract infections caused by *Staphylococcus aureus*, *Lett. Appl. Microbiol.* **48**: 65-70.
5. **Wirawan, R. E., Kleese, N. A., Jack, R. W., and Tagg, J. R.** (2006) Molecular and genetic characterization of a novel nisin variant produced by *Streptococcus uberis*, *Appl. Environ. Microbiol.* **72**: 1148-1156.
6. **Gross, E., and Nebelin, E.** (1973) Structural Elucidation of Subtilin, *Fed. Proc.* **32**: 577-&.
7. **Stein, T., Borchert, S., Conrad, B., Feesche, J., Hofemeister, B., Hofemeister, J., and Entian, K. D.** (2002) Two different lantibiotic-like peptides originate from the ericin gene cluster of *Bacillus subtilis* A1/3, *J. Bacteriol.* **184**: 1703-1711.
8. **Wescombe, P. A., and Tagg, J. R.** (2003) Purification and characterization of streptin, a type A1 lantibiotic produced by *Streptococcus pyogenes*, *Appl. Environ. Microbiol.* **69**: 2737-2747.
9. **Allgaier, H., Jung, G., Werner, R. G., Schneider, U., and Zahner, H.** (1986) Epidermin - Sequencing of a Heterodet Tetracyclic 21-Peptide Amide Antibiotic, *Eur. J. Biochem.* **160**: 9-22.
10. **Israil, A. M., Jack, R. W., Jung, G., and Sahl, H. G.** (1996) Isolation of a new epidermin variant from two strains of *Staphylococcus epidermidis*--frequency of lantibiotic production in coagulase-negative staphylococci, *Zentralblatt Für Bakteriologie: Int. J. Med. Microbiol.* **284**: 285.
11. **Kellner, R., Jung, G., Horner, T., Zahner, H., Schnell, N., Entian, K. D., and Gotz, F.** (1988) Gallidermin - a New Lanthionine-Containing Polypeptide Antibiotic, *Eur. J. Biochem.* **177**: 53-59.
12. **Furmanek, B., Kaczorowski, T., Bugalski, R., Bielawski, K., Bogdanowicz, J., and Podhajaska, A. J.** (1999) Identification, characterization and purification of the lantibiotic staphylococcin T, a natural gallidermin variant, *J. Appl. Microbiol.* **87**: 856-866.
13. **MotaMeira, M., Lacroix, C., LaPointe, G., and Lavoie, M. C.** (1997) Purification and structure of mutacin B-Ny266: A new lantibiotic produced by *Streptococcus mutans*, *Febs Lett.* **410**: 275-279.
14. **Qi, F. X., Chen, P., and Caufield, P. W.** (1999) Purification of mutacin III from group III *Streptococcus mutans* UA787 and genetic analyses of mutacin III biosynthesis genes, *Appl. Environ. Microbiol.* **65**: 3880-3887.
15. **Smith, L., Novak, J., Rocca, J., McClung, S., Hillman, J. D., and Edison, A. S.** (2000) Covalent structure of mutacin 1140 and a novel method for the rapid identification of lantibiotics, *Eur. J. Biochem.* **267**: 6810-6816.
16. **Qi, F. X., Chen, P., and Caufield, P. W.** (2000) Purification and biochemical characterization of mutacin I from the group I strain of *Streptococcus mutans*, CH43, and genetic analysis of mutacin I biosynthesis genes, *Appl. Environ. Microbiol.* **66**: 3221-3229.
17. **Castiglione, F., Lazzarini, A., Carrano, L., Corti, E., Ciciliato, I., Gastaldo, L., Candiani, P., Losi, D., Marinelli, F., Selva, E., and Parenti, F.** (2008) Determining the structure and mode of action of microbisporicin, a potent lantibiotic active against multiresistant pathogens, *Chem. Biol.* **15**: 22-31.
18. **Vandekamp, M., Vandenhoooven, H. W., Konings, R. N. H., Bierbaum, G., Sahl, H. G., Kuipers, O. P., Siezen, R. J., Devos, W. M., Hilbers, C. W., and Vandeven, F. J. M.** (1995) Elucidation of the Primary Structure of the Lantibiotic Epilancin K7 From *Staphylococcus-Epidermidis* K7 - Cloning and Characterization of the Epilancin-K7-Encoding Gene and Nmr Analysis of Mature Epilancin K7, *Eur. J. Biochem.* **230**: 587-600.
19. **Ekkelenkamp, M. B., Hanssen, M., Hsu, S. T. D., de Jong, A., Milatovic, D., Verhoef, J., and van Nuland, N. A. J.** (2005) Isolation and structural characterization of epilancin 15X, a novel lantibiotic from a clinical strain of *Staphylococcus epidermidis*, *Febs Lett.* **579**: 1917-1922.

20. Kaletta, C., Entian, K. D., Kellner, R., Jung, G., Reis, M., and Sahl, H. G. (1989) Pep5, a New Lantibiotic - Structural Gene Isolation and Prepeptide Sequence, *Arch. Microbiol.* **152**, 16-19.
21. **Heidrich, C., Pag, U., Josten, M., Metzger, J., Jack, R. W., Bierbaum, G., Jung, G., and Sahl, H. G.** (1998) Isolation, characterization, and heterologous expression of the novel lantibiotic epicidin 280 and analysis of its biosynthetic gene cluster, *Appl. Environ. Microbiol.* **64**: 3140-3146.
